# Supplementary material for: A Review about Functional Illiteracy: Definition, Cognitive, Linguistic, and Numerical Aspects
Source: PubMed Central journal article supplement (PMC5102880; doi:10.3389/fpsyg.2016.01617), 2016-11-10
Supplement: Table_1.pdf [file Table_1.pdf]

*Supplementary Material*

**A Review about Functional Illiteracy:**

**Definition, Cognitive, Linguistic and Numerical Aspects**

**Réka Vágvölgyi\*, Andra Coldea, Thomas Dresler, Josef Schrader & Hans-Christoph Nuerk\***

**\* Correspondence:**

Réka Vágvölgyi, reka.vagvoelgyi@lead.uni-tuebingen.de

Hans-Christoph Nuerk, hc.nuerk@uni-tuebingen.de

**1 Supplementary Tables**

**Supplementary Table S1 | Summary of language related deficits of illiterates, functional illiterates, dyslexic adults and children**

| Group                             | Performance | Study                                    | Sample characteristics                                                              |                                                                                                                                                            |                                        | Task                                                                               |
|-----------------------------------|-------------|------------------------------------------|-------------------------------------------------------------------------------------|------------------------------------------------------------------------------------------------------------------------------------------------------------|----------------------------------------|------------------------------------------------------------------------------------|
|                                   |             |                                          | Experimental                                                                        | Control                                                                                                                                                    | Match                                  |                                                                                    |
| <b>1. Phonological processing</b> |             |                                          |                                                                                     |                                                                                                                                                            |                                        |                                                                                    |
| <b>Illiterates</b>                | Deficit     | Morais et al., 1979                      | 30 illiterate adults (age: 38-60)                                                   | 30 people who learned to read beyond the usual age (age: 26-60)                                                                                            |                                        | phoneme addition and phoneme deletion tasks                                        |
|                                   |             | Rosselli et al., 1990 <sup>1</sup>       | 100 native Spanish illiterates with no formal education and with illiterate parents | 100 Spanish native professionals with professional parents                                                                                                 | age, gender, handedness                | phonological discrimination, word repetition, phonological fluency (letters: f, s) |
|                                   |             | Reis and Castro-Caldas, 1997             | 20 illiterate adults                                                                | 10 literate adults                                                                                                                                         | gender, cultural and social background | pseudo-word repetition, phonological fluency (letters: p, b)                       |
|                                   |             | Castro-Caldas, 1998                      | 6 illiterate adults (age: 60-70)                                                    | 6 literate adults (age: 57-69)                                                                                                                             | gender, social and cultural background | pseudo-word repetition                                                             |
|                                   |             | Ostrosky-Solis et al., 1999 <sup>2</sup> | 199 native Spanish illiterate adults (age: 16-85)                                   | 199 / 201 / 201 native Spanish participants with 1-4 / 5-9 / 10-24 years of schooling (age: 16-85)                                                         |                                        | phonological fluency (letter: f)                                                   |
|                                   |             | Petersson et al., 2000                   | 6 illiterate adults                                                                 | 6 literate adults with 4 years of schooling                                                                                                                | gender                                 | pseudo-word repetition                                                             |
|                                   |             | Kosmidis et al., 2004                    | 19 illiterate adults (age: 63-92)                                                   | 20 literate/low literate adults with 1-9 years of schooling (age: 56-85) / 21 literate/high- educated women with minimum 9 years of schooling (age: 55-74) | age, gender / gender                   | phonological fluency                                                               |

*(Continued)*

<sup>1</sup> The authors divided the participants into groups according to 3 variables. Here we used the most relevant grouping variable: educational level.

<sup>2</sup> The authors ranked the participants into 16 groups according to age and years of education. Here we focus on the years of education.

Supplementary Table S1 | Continued: Phonological processing

| Group                         | Performance | Study                                   | Sample characteristics                                                                   |                                                                                                                                                                             |                                   | Task                                                                                                                                         |
|-------------------------------|-------------|-----------------------------------------|------------------------------------------------------------------------------------------|-----------------------------------------------------------------------------------------------------------------------------------------------------------------------------|-----------------------------------|----------------------------------------------------------------------------------------------------------------------------------------------|
|                               |             |                                         | Experimental                                                                             | Control                                                                                                                                                                     | Match                             |                                                                                                                                              |
| <b>Illiterates</b>            | Deficit     | Kosmidis et al., 2006                   | 19 illiterate adults (age: 63-92)                                                        | 20 literate/low literate adults with 1-9 years of schooling (age: 56-85) / 15 literate/high- educated women with minimum 10 years of schooling (age: 55-74)                 | age, gender / gender              | pseudo-word repetition                                                                                                                       |
| <b>Functional Illiterates</b> | Deficit     | Greenberg et al., 1997 <sup>3</sup> (2) | 72 native English adults from ABE classes (age: 21-45)                                   | 72 native English children from Grades 3 to 5                                                                                                                               | gender, race, reading level       | nonword decoding: pseudo-word reading (Woodcock Reading Mastery Test-Revised), phoneme deletion, phoneme segmentation                        |
|                               |             | Thompkins and Binder, 2003 (2)          | the 15 less and the 15 most skilled readers from 60 adults from ABE classes (age: 17-55) | 30 control children chosen from a 99 pool (age: 5-8)                                                                                                                        | reading level                     | phoneme recognition, phoneme deletion, phonological spelling                                                                                 |
|                               |             | Eme, 2006 (3) <sup>4</sup>              | 50 native French functional illiterates (age: 17-55)                                     | 20 / 20 / 20 / 20 native French control children from preparatory class (CP) / "1st grade" (CE1) / "2nd grade" (CE2) / "4th grade" (CM2) (mean age: 6,7 / 7,6 / 8.8 / 10.7) |                                   | reading and writing pseudo-words <sup>5</sup> , phoneme deletion <sup>6</sup> , phoneme segmentation <sup>7</sup>                            |
|                               |             | Grosche, 2012 (3)                       | 54 ABE students (age: 33-53)                                                             | 66 native German control adults / 54 children from 1st to 4th grade (age: 32-53 / 7-9)                                                                                      | chronological age / reading level | vowel substitution, phoneme categorization, identification of vowels' length <sup>8</sup> (Basiskompetenzen für Lese-Rechtschreibleistungen) |

For explanation of (2), (3) see end of the table.  
(Continued)

<sup>3</sup> Main effect of groups.

<sup>4</sup> Main effect of groups.

<sup>5</sup> Significant difference with CE1, CE2, CM2.

<sup>6</sup> Significant difference with CE2, CM2.

<sup>7</sup> Significant difference with CE1, CE2, CM2.

<sup>8</sup> Non-significant difference between functional illiterates and children.

Supplementary Table S1 | Continued: Phonological processing

| Group                         | Performance | Study                      | Sample characteristics                                                             |                                                                                                                                                                             |                                        | Task                                                                                                             |
|-------------------------------|-------------|----------------------------|------------------------------------------------------------------------------------|-----------------------------------------------------------------------------------------------------------------------------------------------------------------------------|----------------------------------------|------------------------------------------------------------------------------------------------------------------|
|                               |             |                            | Experimental                                                                       | Control                                                                                                                                                                     | Match                                  |                                                                                                                  |
| <b>Functional Illiterates</b> | Deficit     | Eme et al., 2014 (3)       | 52 native French ABE students (age: 17-55)                                         | 52 native French children from 1st to 3rd grade                                                                                                                             | reading level                          | pseudo-word reading, phonological recall (Wechsler Adult Intelligence Scale-III), phoneme deletion and inversion |
|                               | Normal      | Eme, 2006 (3) <sup>9</sup> | 50 native French functional illiterates (age: 17-55)                               | 20 / 20 / 20 / 20 native French control children from preparatory class (CP) / "1st grade" (CE1) / "2nd grade" (CE2) / "4th grade" (CM2) (mean age: 6.7 / 7.6 / 8.8 / 10.7) |                                        | syllable deletion                                                                                                |
|                               |             | Grosche, 2012 (3)          | 54 ABE students (age: 33-53)                                                       | 54 children from 1st to 4th grade (age: 7-9)                                                                                                                                | reading level                          | identification of vowels' length (Basiskompetenzen für Leserechtschreibleistungen)                               |
| <b>Dyslexic Adults</b>        | Deficit     | Hatcher et al., 2002       | 23 dyslexic university students (age: 19-52)                                       | 50 university students (age: 18-41)                                                                                                                                         | verbal and non-verbal abilities        | nonsense passage reading, spoonerism, phonemic fluency (letters: m, d, s)                                        |
|                               |             | Ramus et al., 2003         | 16 dyslexic university students (age: 19-22)                                       | 16 university students (age: 19-24)                                                                                                                                         | age, gender, handedness, full-scale IQ | automatic digit naming, spoonerism, non-word repetition, non-word reading                                        |
|                               |             | Rüsseler et al., 2007      | 11 native German high-achieving dyslexic adults (university students) (age: 19-30) | 11 native German university students (age: 19-33)                                                                                                                           | age, gender, handedness                | rhyme judgment                                                                                                   |
|                               |             | De Smedt and Boets, 2011   | 25 dyslexic university students (age: 18-28)                                       | 25 normal reading controls (age: 18-29)                                                                                                                                     | age, nonverbal IQ                      | phoneme deletion, spoonerism                                                                                     |

For explanation of (3) see end of the table.  
(Continued)

<sup>9</sup> Main effect of groups.

Supplementary Table S1 | Continued: Phonological processing

| Group                    | Performance | Study                    | Sample characteristics                                                                                                      |                                                                    |                                                             | Task                                                                                                    |
|--------------------------|-------------|--------------------------|-----------------------------------------------------------------------------------------------------------------------------|--------------------------------------------------------------------|-------------------------------------------------------------|---------------------------------------------------------------------------------------------------------|
|                          |             |                          | Experimental                                                                                                                | Control                                                            | Match                                                       |                                                                                                         |
| <b>Dyslexic Adults</b>   | Deficit     | Beidas et al., 2013      | 34 native Hebrew dyslexic university students (age: 21-28)                                                                  | 35 native Hebrew university students (age: 21-28)                  | chronological age, nonverbal IQ, verbal ability, handedness | One Minute Tests for Words and Non-Words, phonemic deletion from pseudo-words, segmentation             |
|                          |             | Bogdanowicz et al., 2014 | 93 native Polish developmental dyslexic university students (age: 19-24)                                                    | 87 native Polish university students (age: 20-24)                  |                                                             | Unknown Language Test - part one                                                                        |
|                          |             | Law et al., 2015         | 36 native English dyslexic university students (age: 17-26)                                                                 | 54 native English university students (age: 19-25)                 | age, gender, education, non-verbal IQ                       | spoonerism (onset-rhyme awareness, phoneme manipulation and deletion) (Phonological Assessment Battery) |
|                          |             | Wilson et al., 2015      | 18 / 22 / 26 native English dyslexic (a) / dyscalculic (b) / dyslexic & dyscalculic adults (c) (age: 30-32 / 27-31 / 28-32) | 19 native English control adults (d) (age: 26-30)                  | age, gender, handedness, education, socio-economic status   | Phoneme reversal (Comprehensive Test of Phonological Processing) <sup>10</sup>                          |
| <b>Dyslexic Children</b> | Deficit     | Joanisse et al., 2000    | 61 dyslexic children (age: 7-9)                                                                                             | 52 / 37 non-dyslexic children (age: 7-9 / 6-8)                     | chronological age / reading level                           | phoneme deletion and blending                                                                           |
|                          |             | Casalis et al., 2004     | 33 native French dyslexic children (age: 8-12)                                                                              | 33 / 33 native French non-dyslexic children (mean age: 7.4 / 10.8) | chronological age / reading age                             | phoneme suppression                                                                                     |
|                          |             | White et al., 2006       | 23 dyslexic children (age: 8-12)                                                                                            | 22 control children (age: 8-12)                                    | age, gender, non-verbal IQ                                  | rhyme, spoonerism, non-word reading (Phonological Assessment Battery)                                   |
|                          |             | Everatt et al., 2008     | 20 native English dyslexic children (age: 11-12)                                                                            | 40 native English control children (age: 11-12)                    | age, gender                                                 | phonological segmentation (Dyslexia Screening Test)                                                     |

(Continued)

<sup>10</sup> Significant difference between a and d.

Supplementary Table S1 | Continued: Phonological processing

| Group                    | Performance | Study                     | Sample characteristics                                                                                                                      |                                                                                                                          |                                           | Task                                                                                                                  |
|--------------------------|-------------|---------------------------|---------------------------------------------------------------------------------------------------------------------------------------------|--------------------------------------------------------------------------------------------------------------------------|-------------------------------------------|-----------------------------------------------------------------------------------------------------------------------|
|                          |             |                           | Experimental                                                                                                                                | Control                                                                                                                  | Match                                     |                                                                                                                       |
| <b>Dyslexic Children</b> | Deficit     | Landerl et al., 2009      | 21 native German dyslexic children (a) (age: 7-10)                                                                                          | 20 / 26 / 42 native German dyscalculic (b) / dyslexic & dyscalculic (c) / control children (d) (age: 7-10 / 7-11 / 7-10) | age                                       | phoneme deletion <sup>11</sup>                                                                                        |
|                          |             | Willcutt et al, 2013      | 241 /183 / 188 children with reading disability (a) / math disability (b) / reading & math disability (c) (age: 8-13 / 9-13/ 8-13)          | 411 control children (d) (age: 8-13)                                                                                     | age, gender, ethnicity                    | phoneme deletion, pig latin <sup>12</sup>                                                                             |
|                          |             | Zoubrinetzky et al., 2014 | 14 / 14 native French dyslexic children with visual attention span difficulties (a) / with phonological difficulties (b) (age: 8-12 / 8-11) | 14 / 14 native French control children (c) / (d) (age: 8-11 / 6-7)                                                       | (c) chronological age / (d) reading age   | phoneme deletion and segmentation, acronyms (Batterie d'évaluation du langage écrit et de ces troubles) <sup>13</sup> |
|                          |             | Varvara et al., 2014      | 60 children and adolescents with developmental dyslexia (age: 8-17)                                                                         | 65 children with typical reading abilities (age: 8-16)                                                                   | chronological and mental age              | spoonerism, phonological fluency (letters: f, a, s)                                                                   |
|                          | Normal      | Landerl et al., 2009      | 21 native German dyslexic children (a) (age: 7-10)                                                                                          | 20 / 26 / 42 native German dyscalculic (b) / dyslexic & dyscalculic (c) / control children (d) (age: 7-10 / 7-11 / 7-10) | age                                       | phonological fluency (letter: m)                                                                                      |
|                          |             | Chung et al., 2010        | 77 dyslexic students (age: 12-14)                                                                                                           | 27 / 27 normally achieving students (age: 12-14 / 9-13)                                                                  | chronological age, IQ / reading level, IQ | phoneme onset deletion                                                                                                |

(Continued)

<sup>11</sup> Significant difference between a and b, d.

<sup>12</sup> Significant difference between a, b and d.

<sup>13</sup> Significant difference between a and b, d; b and a, c, d; c and b, d; d and a, b, c.

Supplementary Table S1 | Continued: Orthographic processing

| Group                             | Performance | Study                                    | Sample characteristics                                                                   |                                                                                                                                                                             |                             | Task                                                       |
|-----------------------------------|-------------|------------------------------------------|------------------------------------------------------------------------------------------|-----------------------------------------------------------------------------------------------------------------------------------------------------------------------------|-----------------------------|------------------------------------------------------------|
|                                   |             |                                          | Experimental                                                                             | Control                                                                                                                                                                     | Match                       |                                                            |
| <b>2. Orthographic processing</b> |             |                                          |                                                                                          |                                                                                                                                                                             |                             |                                                            |
| <b>Illiterates</b>                | No data     |                                          |                                                                                          |                                                                                                                                                                             |                             |                                                            |
| <b>Functional Illiterates</b>     | Deficit     | Greenberg et al., 1997 <sup>14</sup> (2) | 72 native English adults from ABE classes (age: 21-45)                                   | 72 native English children from 3rd to 5th grade                                                                                                                            | gender, race, reading level | sight word reading, spelling inventory, rhyme word reading |
|                                   |             | Thompkins and Binder, 2003 (2)           | the 15 less and the 15 most skilled readers from 60 adults from ABE classes (age: 17-55) | 30 control children chosen from a 99 pool (age: 5-8)                                                                                                                        | reading level               | orthographic spelling                                      |
|                                   |             | Eme, 2006 (3) <sup>15</sup>              | 50 native French functional illiterates (age: 17-55)                                     | 20 / 20 / 20 / 20 native French control children from preparatory class (CP) / "1st grade" (CE1) / "2nd grade" (CE2) / "4th grade" (CM2) (mean age: 6.7 / 7.6 / 8.8 / 10.7) |                             |                                                            |
| <b>Dyslexic Adults</b>            | Normal      | Greenberg et al., 1997 <sup>19</sup> (2) | 72 native English adults from ABE classes (age: 21-45)                                   | 72 native English children from 3rd to 5th grade                                                                                                                            | gender, race, reading level | wordlikeness choice, letter position                       |
|                                   |             | Thompkins and Binder, 2003 (2)           | the 15 less and the 15 most skilled readers from 60 adults from ABE classes (age: 17-55) | 30 control children chosen from a 99 pool (age: 5-8)                                                                                                                        | reading level               | orthographic constraints                                   |
| <b>Dyslexic Adults</b>            | Deficit     | Bogdanowicz et al., 2014                 | 93 native Polish developmental dyslexic university students (age: 19-24)                 | 87 native Polish university students (age: 20-24)                                                                                                                           |                             | writing a short story: word structure errors               |

For explanation of (2), (3) see end of the table.  
(Continued)

<sup>14</sup> Main effect of groups.

<sup>15</sup> Main effect of groups.

<sup>16</sup> Significant difference with CM2.

<sup>17</sup> Significant difference with CP, CM2.

<sup>18</sup> Significant difference with CP, CM2.

<sup>19</sup> Main effect of groups.

Supplementary Table S1 | Continued: Orthographic processing

| Group                         | Performance | Study                      | Sample characteristics                                             |                                                                                                                            |                                                                                                                 | Task                                                                                         |
|-------------------------------|-------------|----------------------------|--------------------------------------------------------------------|----------------------------------------------------------------------------------------------------------------------------|-----------------------------------------------------------------------------------------------------------------|----------------------------------------------------------------------------------------------|
|                               |             |                            | Experimental                                                       | Control                                                                                                                    | Match                                                                                                           |                                                                                              |
| <b>Dyslexic Adults</b>        | Normal      | Beidas et al., 2013        | 34 native Hebrew dyslexic university students (age: 21-28)         | 35 native Hebrew university students (age: 21-28)                                                                          | chronological age, nonverbal IQ, verbal ability, handedness                                                     | parsing <sup>20</sup>                                                                        |
| <b>Dyslexic Children</b>      | Deficit     | Suarez-Coalla et al., 2014 | 20 native Spanish children with developmental dyslexia (age: 7-10) | 40 / 40 native Spanish control children (age: 7-11 / 6-7)                                                                  | chronological age, gender, IQ, and socio-economic status / reading level, gender, IQ, and socio-economic status | read aloud unfamiliar words alone and within the context of a story, read aloud pseudo-words |
| <b>3. Lexical processing</b>  |             |                            |                                                                    |                                                                                                                            |                                                                                                                 |                                                                                              |
| <b>Illiterates</b>            | Deficit     | Kosmidis et al., 2006      | 19 illiterate adults (age: 63-92)                                  | 20 literate/low literate / 15 literate/high- educated adults with 1-9 / minimum 10 years of schooling (age: 56-85 / 55-74) | age, gender / gender                                                                                            | lexical decision                                                                             |
| <b>Functional Illiterates</b> | Normal      | Eme et al., 2010 (3)       | 52 native French ABE students (age: 17-55)                         | 20 native French proficient readers (age: 18-52)                                                                           | socio-economic status                                                                                           | producing an oral narrative based on 8 pictures: lexical diversity                           |
|                               |             | Eme et al., 2014 (3)       | 52 native French ABE students (age: 17-55)                         | 52 native French children from 1st to 3rd grade                                                                            | reading level                                                                                                   | dictation: lexical errors                                                                    |
| <b>Dyslexic Adults</b>        | No data     |                            |                                                                    |                                                                                                                            |                                                                                                                 |                                                                                              |

For explanation of (3) see end of the table.  
(Continued)

<sup>20</sup> Significant difference in time but not in accuracy.



Supplementary Table S1 | Continued: Lexical processing

| Group                             | Performance | Study                     | Sample characteristics                                                                    |                                                                                                            |                                                                                  | Task                                                                    |
|-----------------------------------|-------------|---------------------------|-------------------------------------------------------------------------------------------|------------------------------------------------------------------------------------------------------------|----------------------------------------------------------------------------------|-------------------------------------------------------------------------|
|                                   |             |                           | Experimental                                                                              | Control                                                                                                    | Match                                                                            |                                                                         |
| <b>Dyslexic Children</b>          | Deficit     | Martens and de Jong, 2006 | 22 dyslexic children (age: 9-10)                                                          | 22 / 22 normal readers (age: 10 / 7-8)                                                                     | age, gender, vocabulary, and nonverbal reasoning ability / reading level, gender | lexical decision                                                        |
| <b>4. Morphological awareness</b> |             |                           |                                                                                           |                                                                                                            |                                                                                  |                                                                         |
| <b>Illiterates</b>                | No data     |                           |                                                                                           |                                                                                                            |                                                                                  |                                                                         |
| <b>Functional Illiterates</b>     | Deficit     | Eme et al., 2010 (3)      | 52 native French ABE students (age: 17-55)                                                | 20 native French proficient readers (age: 18-52)                                                           | socio-economic status                                                            | producing an oral narrative based on 8 pictures: morphosyntactic errors |
|                                   |             | Eme et al., 2014 (3)      | 52 native French ABE students (age: 17-55)                                                | 52 native French children from 1st to 3rd grade                                                            | reading level                                                                    | morphosyntactic integration                                             |
|                                   | Normal      | Eme et al., 2014 (3)      | 52 native French ABE students (age: 17-55)                                                | 52 native French children from 1st to 3rd grade                                                            | reading level                                                                    | sentence recall                                                         |
| <b>Dyslexic Adults</b>            | Deficit     | Law et al., 2015          | 36 / 21 native English dyslexic / noncompensated university students (age: 17-26 / 17-28) | 54 / 15 native English university students / compensated dyslexic university students (age: 19-25 / 20-23) | age, gender, education, non-verbal IQ / gender, non-verbal IQ                    | derivational suffix, nonword sentence completion                        |
| <b>Dyslexic Children</b>          | Deficit     | Joanisse et al., 2000     | 61 dyslexic children (age: 7-9)                                                           | 52 / 37 non-dyslexic children (age: 7-9 / 6-8)                                                             | chronological age / reading level                                                | inflectional morphology                                                 |

For explanation of (3) see end of the table.  
(Continued)

Supplementary Table S1 | Continued: Morphological awareness

| Group                         | Performance | Study                                    | Sample characteristics                                                                   |                                                                    |                                 | Task                                                                                                                                                                       |
|-------------------------------|-------------|------------------------------------------|------------------------------------------------------------------------------------------|--------------------------------------------------------------------|---------------------------------|----------------------------------------------------------------------------------------------------------------------------------------------------------------------------|
|                               |             |                                          | Experimental                                                                             | Control                                                            | Match                           |                                                                                                                                                                            |
| <b>Dyslexic Children</b>      | Deficit     | Casalis et al., 2004                     | 33 native French dyslexic children (age: 8-12)                                           | 33 / 33 native French non-dyslexic children (mean age: 7.4 / 10.8) | chronological age / reading age | morphological analysis: segmentation, suffix deletion, derivation in sentence completion <sup>21</sup> , production after definition <sup>22</sup> , morphological fluency |
|                               |             | Chung et al., 2010                       | 77 dyslexic students (age: 12-14)                                                        | 27 normally achieving students (age: 12-14)                        | chronological age, IQ           | morpheme discrimination, morpheme production                                                                                                                               |
|                               | Normal      | Casalis et al., 2004                     | 33 native French dyslexic children (age: 8-12)                                           | 33 / 33 native French non-dyslexic children (mean age: 7.4 / 10.8) | chronological age / reading age | morphological analysis: blending                                                                                                                                           |
|                               |             | Chung et al., 2010                       | 77 dyslexic students (age: 12-14)                                                        | 27 normally achieving students (age: 9-13)                         | reading level, IQ               | morpheme discrimination, morpheme production                                                                                                                               |
| <b>5. Spelling</b>            |             |                                          |                                                                                          |                                                                    |                                 |                                                                                                                                                                            |
| <b>Illiterates</b>            | No data     |                                          |                                                                                          |                                                                    |                                 |                                                                                                                                                                            |
| <b>Functional Illiterates</b> | Deficit     | Greenberg et al., 1997 <sup>23</sup> (2) | 72 native English adults from ABE classes (age: 21-45)                                   | 72 native English children from 3rd to 5th grade                   | gender, race, reading level     | spelling inventory                                                                                                                                                         |
|                               |             | Thompkins and Binder, 2003 (2)           | the 15 less and the 15 most skilled readers from 60 adults from ABE classes (age: 17-55) | 30 control children chosen from a 99 pool (age: 5-8)               | reading level                   | phonological spelling, orthographic spelling                                                                                                                               |
|                               |             | Eme et al., 2014 (3)                     | 52 native French ABE students (age: 17-55)                                               | 52 native French children from 1st to 3rd grade                    | reading level                   | pseudo-word spelling, dictation                                                                                                                                            |

For explanation of (2), (3) see end of the table.  
(Continued)

<sup>21</sup> Main effect of groups.

<sup>22</sup> Main effect of groups.

<sup>23</sup> Main effect of groups.

Supplementary Table S1 | Continued: Spelling

| Group                         | Performance         | Study                                                                                                                       | Sample characteristics                                                     |                                                                         |                                                             | Task                                                          |
|-------------------------------|---------------------|-----------------------------------------------------------------------------------------------------------------------------|----------------------------------------------------------------------------|-------------------------------------------------------------------------|-------------------------------------------------------------|---------------------------------------------------------------|
|                               |                     |                                                                                                                             | Experimental                                                               | Control                                                                 | Match                                                       |                                                               |
| <b>Functional Illiterates</b> | Normal              | Eme et al., 2014 (3)                                                                                                        | 52 native French ABE students (age: 17-55)                                 | 52 native French children from 1st to 3rd grade                         | reading level                                               | dictation: word spelling, grammatical errors                  |
| <b>Dyslexic Adults</b>        | Deficit             | Hatcher et al., 2002                                                                                                        | 23 dyslexic university students (age: 19-52)                               | 50 university students (age: 18-41)                                     | verbal and non-verbal abilities                             | Wide Range Achievement Test of Spelling                       |
|                               |                     | Beidas et al., 2013                                                                                                         | 34 native Hebrew dyslexic university students (age: 21-28)                 | 35 native Hebrew university students (age: 21-28)                       | chronological age, nonverbal IQ, verbal ability, handedness | spelling                                                      |
|                               |                     | Law et al., 2015                                                                                                            | 36 native English dyslexic university students (age: 17-26)                | 54 native English university students (age: 19-25)                      | age, gender, education, non-verbal IQ                       | spelling (Wechsler Individual Achievement Test-III)           |
|                               | Wilson et al., 2015 | 18 / 22 / 26 native English dyslexic (a) / dyscalculic (b) / dyslexic & dyscalculic adults (c) (age: 30-32 / 27-31 / 28-32) | 19 native English control adults (d) (age: 26-30)                          | age, gender, handedness, education, socio-economic status               | regular and irregular word spelling <sup>24</sup>           |                                                               |
|                               | Normal              | Law et al., 2015                                                                                                            | 21 native English noncompensated dyslexic university students (age: 17-28) | 15 native English compensated dyslexic university students (age: 20-23) | gender, non-verbal IQ                                       | spelling (Wechsler Individual Achievement Test-III)           |
| <b>Dyslexic Children</b>      | Deficit             | White et al., 2006                                                                                                          | 23 dyslexic children (age: 8-12)                                           | 22 control children (age: 8-12)                                         | age, gender, non-verbal IQ                                  | spelling (Wide Range Achievement Test)                        |
|                               |                     | Everatt et al., 2008                                                                                                        | 20 native English dyslexic children (age: 11-12)                           | 40 native English control children (age: 11-12)                         | age, gender                                                 | word spelling (based on the Vernon Graded Word Spelling test) |
|                               |                     | Chung et al., 2010                                                                                                          | 77 dyslexic students (age: 12-14)                                          | 27 / 27 normally achieving students (age: 12-14 / 9-13)                 | chronological age, IQ / reading level, IQ                   | Chinese word dictation                                        |

For explanation of (3) see end of the table.  
(Continued)

<sup>24</sup> Significant difference between a and d.

Supplementary Table S1 | Continued: Vocabulary

| Group                         | Performance | Study                                    | Sample characteristics                                                     |                                                                                                                                                                             |                                     | Task                                                                                       |
|-------------------------------|-------------|------------------------------------------|----------------------------------------------------------------------------|-----------------------------------------------------------------------------------------------------------------------------------------------------------------------------|-------------------------------------|--------------------------------------------------------------------------------------------|
|                               |             |                                          | Experimental                                                               | Control                                                                                                                                                                     | Match                               |                                                                                            |
| <b>6. Vocabulary</b>          |             |                                          |                                                                            |                                                                                                                                                                             |                                     |                                                                                            |
| <b>Illiterates</b>            | No data     |                                          |                                                                            |                                                                                                                                                                             |                                     |                                                                                            |
| <b>Functional Illiterates</b> | Deficit     | Greenberg et al., 1997 <sup>25</sup> (2) | 72 native English adults from ABE classes (age: 21-45)                     | 72 native English children from 3rd to 5th grade                                                                                                                            | gender, race, reading level         | repetitive vocabulary (Peabody Picture Vocabulary Test-Revised)                            |
|                               |             | Eme, 2006 (3) <sup>26</sup>              | 50 native French functional illiterate adults (age: 17-55)                 | 20 / 20 / 20 / 20 native French control children from preparatory class (CP) / "1st grade" (CE1) / "2nd grade" (CE2) / "4th grade" (CM2) (mean age: 6.7 / 7.6 / 8.8 / 10.7) |                                     | antonym <sup>27</sup> and vocabulary <sup>28</sup> (Wechsler Adult Intelligence Scale-III) |
|                               |             | Eme et al., 2014 (3)                     | 52 native French ABE students (age: 17-55)                                 | 52 native French children from 1st to 3rd grade                                                                                                                             | reading level                       | antonym and vocabulary                                                                     |
| <b>Dyslexic Adults</b>        | Deficit     | Law et al., 2015                         | 21 native English noncompensated dyslexic university students (age: 17-28) | 15 native English compensated dyslexic university students (age: 20-23)                                                                                                     | gender, non-verbal IQ               | word definition (Clinical Evaluation of Language Fundamentals Fourth Edition)              |
|                               |             | Normal                                   | Hatcher et al., 2002                                                       | 23 dyslexic university students (age: 19-52)                                                                                                                                | 50 university students (age: 18-41) | verbal and non-verbal abilities                                                            |
|                               |             | Wiseheart et al., 2009                   | 23 native English adults with developmental dyslexia (age: 17-23)          | 33 native English university students (age: 18-23)                                                                                                                          | age                                 | vocabulary (Wechsler Adult Intelligence Scale-III), Shipley Vocabulary Test                |

For explanation of (2), (3) see end of the table.  
(Continued)

<sup>25</sup> Main effect of groups.

<sup>26</sup> Main effect of groups.

<sup>27</sup> Significant difference with CP.

<sup>28</sup> Significant difference with CP, CE1.

Supplementary Table S1 | Continued: Vocabulary

| Group                            | Performance | Study                                     | Sample characteristics                                                              |                                                                                                                                                            |                                                              | Task                                                                                                                                          |
|----------------------------------|-------------|-------------------------------------------|-------------------------------------------------------------------------------------|------------------------------------------------------------------------------------------------------------------------------------------------------------|--------------------------------------------------------------|-----------------------------------------------------------------------------------------------------------------------------------------------|
|                                  |             |                                           | Experimental                                                                        | Control                                                                                                                                                    | Match                                                        |                                                                                                                                               |
| <b>Dyslexic Adults</b>           | Normal      | Cavalli et al., 2016                      | 20 French native university students with dyslexia (age: 19-28)                     | 20 French native university students (age: 19-28)                                                                                                          | chronological age, gender, non-verbal IQ, level of education | vocabulary breadth (Echelle de Vocabulaire en Images Peabody), vocabulary depth (vocabulary subtest of Wechsler Adult Intelligence Scale-III) |
| <b>Dyslexic Children</b>         | Deficit     | Joanisse et al., 2000                     | 61 dyslexic children (age: 7-9)                                                     | 52 / 37 non-dyslexic children (age: 7-9 / 6-8)                                                                                                             | chronological age / reading level                            | vocabulary (Wechsler Intelligence Scale for Children-III)                                                                                     |
|                                  | Normal      | Everatt et al., 2008                      | 20 native English dyslexic children (age: 11-12)                                    | 40 native English control children (age: 11-12)                                                                                                            | age, gender                                                  | British Picture Vocabulary Scale                                                                                                              |
| <b>7. Reading/verbal fluency</b> |             |                                           |                                                                                     |                                                                                                                                                            |                                                              |                                                                                                                                               |
| <b>Illiterates</b>               | Deficit     | Rosselli et al., 1990 <sup>29</sup>       | 100 native Spanish illiterates with no formal education and with illiterate parents | 100 native Spanish professionals with professional parents                                                                                                 | age, gender, handedness                                      | semantic fluency (categories: animals, fruits)                                                                                                |
|                                  |             | Reis and Castro-Caldas, 1997              | 20 illiterate adults                                                                | 10 literate adults                                                                                                                                         | gender, cultural and social background                       | semantic fluency (categories: animals, furnitures)                                                                                            |
|                                  |             | Ostrosky-Solis et al., 1999 <sup>30</sup> | 199 native Spanish illiterates (age: 16-85)                                         | 199 / 201 / 201 native Spanish participants with 1-4 / 5-9 / 10-24 years of schooling (age: 16-85)                                                         |                                                              | semantic fluency (category: animal)                                                                                                           |
|                                  |             | Kosmidis et al., 2004                     | 19 illiterate adults (age: 63-92)                                                   | 20 literate/low literate adults with 1-9 years of schooling (age: 56-85) / 21 literate/high- educated women with minimum 9 years of schooling (age: 55-74) | age, gender / gender                                         | semantic fluency (categories: animals, objects, fruits)                                                                                       |

(Continued)

<sup>29</sup> The authors divided the participants into groups according to 3 variables. Here we used the most relevant grouping variable: educational level.

<sup>30</sup> The authors ranked the participants into 16 groups according to age and years of education. Here we focus on the years of education.

Supplementary Table S1 | Continued: Reading/verbal fluency

| Group                         | Performance | Study                            | Sample characteristics                                              |                                                                                                                          |                                                                                        | Task                                                               |
|-------------------------------|-------------|----------------------------------|---------------------------------------------------------------------|--------------------------------------------------------------------------------------------------------------------------|----------------------------------------------------------------------------------------|--------------------------------------------------------------------|
|                               |             |                                  | Experimental                                                        | Control                                                                                                                  | Match                                                                                  |                                                                    |
| <b>Illiterates</b>            | Normal      | Reis et al., 2003                | 23 completely illiterates (age: 57-76)                              | 18 / 9 literates with 4 / more than 4 years of schooling (age: 51-76 / 56-69)                                            | age, gender, general health, sociocultural background, level of everyday functionality | semantic fluency (category: supermarket)                           |
| <b>Functional Illiterates</b> | Deficit     | Van Linden and Cremers, 2008 (1) | 23 functional illiterate adults (age: 21-76)                        | 23 literate adults (age: 19-64)                                                                                          | age, gender                                                                            | reading and writing fluency                                        |
| <b>Dyslexic Adults</b>        | Normal      | Hatcher et al., 2002             | 23 dyslexic university students (age: 19-52)                        | 50 university students (age: 18-41)                                                                                      | verbal and non-verbal abilities                                                        | semantic fluency (categories: animals, food)                       |
| <b>Dyslexic Children</b>      | Deficit     | White et al., 2006               | 23 dyslexic children (age: 8-12)                                    | 22 control children (age: 8-12)                                                                                          | age, gender, non-verbal IQ                                                             | rhyme fluency (Phonological Assessment Battery)                    |
|                               |             | Varvara et al., 2014             | 60 children and adolescents with developmental dyslexia (age: 8-17) | 65 children with typical reading abilities (age: 8-16)                                                                   | chronological and mental age                                                           | category fluency (categories: e.g. animals, clothes, fruits, toys) |
|                               | Normal      | White et al., 2006               | 23 dyslexic children (age: 8-12)                                    | 22 control children (age: 8-12)                                                                                          | age, gender, non-verbal IQ                                                             | alliteration, semantic fluency (Phonological Assessment Battery)   |
|                               |             | Landerl et al., 2009             | 21 native German dyslexic children (a) (age: 7-10)                  | 20 / 26 / 42 native German dyscalculic (b) / dyslexic & dyscalculic (c) / control children (d) (age: 7-10 / 7-11 / 7-10) | age                                                                                    | semantic fluency (category: animals)                               |

For explanation of (1) see end of the table.  
(Continued)

Supplementary Table S1 | Continued: Sentence comprehension

| Group                            | Performance | Study                                     | Sample characteristics                                            |                                                                                                                                                                             |       | Task                                                                                 |
|----------------------------------|-------------|-------------------------------------------|-------------------------------------------------------------------|-----------------------------------------------------------------------------------------------------------------------------------------------------------------------------|-------|--------------------------------------------------------------------------------------|
|                                  |             |                                           | Experimental                                                      | Control                                                                                                                                                                     | Match |                                                                                      |
| <b>8. Sentence comprehension</b> |             |                                           |                                                                   |                                                                                                                                                                             |       |                                                                                      |
| <b>Illiterates</b>               | No data     |                                           |                                                                   |                                                                                                                                                                             |       |                                                                                      |
| <b>Functional Illiterates</b>    | Deficit     | Eme, 2006 (3) <sup>31</sup>               | 50 native French functional illiterates (age: 17-55)              | 20 / 20 / 20 / 20 native French control children from preparatory class (CP) / "1st grade" (CE1) / "2nd grade" (CE2) / "4th grade" (CM2) (mean age: 6.7 / 7.6 / 8.8 / 10.7) |       | complete sentences <sup>32</sup> (Language Oral, Language Écrit, Mémoire, Attention) |
| <b>Dyslexic Adults</b>           | Deficit     | Wiseheart et al., 2009                    | 23 native English adults with developmental dyslexia (age: 17-23) | 33 native English university students (age: 18-23)                                                                                                                          | age   | Kempler Sentence Comprehension Test                                                  |
| <b>Dyslexic Children</b>         | Deficit     | Rimrod et al., 2009                       | 14 children with learning disabilities/dyslexia (age: 9-14)       | 15 control children (age: 10-14)                                                                                                                                            | age   | sentence comprehension <sup>33</sup>                                                 |
|                                  | Normal      | Rimrod et al., 2009                       | 14 children with learning disabilities/dyslexia (age: 9-14)       | 15 control children (age: 10-14)                                                                                                                                            | age   | word recognition                                                                     |
| <b>9. Reading comprehension</b>  |             |                                           |                                                                   |                                                                                                                                                                             |       |                                                                                      |
| <b>Illiterates</b>               | Deficit     | Ostrosky-Solis et al., 1999 <sup>34</sup> | 199 native Spanish illiterate adults (age: 16-85)                 | 199 / 201 / 201 native Spanish participants with 1-4 / 5-9 / 10-24 years of schooling (age: 16-85)                                                                          |       | read a story aloud and answer some questions                                         |

For explanation of (3) see end of the table.  
(Continued)

<sup>31</sup> Main effect of groups.

<sup>32</sup> Significant difference with CP, CM2.

<sup>33</sup> Significant difference in accuracy.

<sup>34</sup> The authors ranked the participants into 16 groups according to age and years of education. Here we focus on the years of education.

Supplementary Table S1 | Continued: Reading comprehension

| Group                         | Performance | Study                       | Sample characteristics                                                                    |                                                                                                                                                                             |                                                               | Task                                     |
|-------------------------------|-------------|-----------------------------|-------------------------------------------------------------------------------------------|-----------------------------------------------------------------------------------------------------------------------------------------------------------------------------|---------------------------------------------------------------|------------------------------------------|
|                               |             |                             | Experimental                                                                              | Control                                                                                                                                                                     | Match                                                         |                                          |
| <b>Functional Illiterates</b> | Deficit     | Eme, 2006 (3) <sup>35</sup> | 50 native French functional illiterate adults (age: 17-55)                                | 20 / 20 / 20 / 20 native French control children from preparatory class (CP) / "1st grade" (CE1) / "2nd grade" (CE2) / "4th grade" (CM2) (mean age: 6.7 / 7.6 / 8.8 / 10.7) |                                                               | written text comprehension <sup>36</sup> |
|                               | Normal      | Eme et al., 2014 (3)        | 52 native French ABE students (age: 17-55)                                                | 52 native French children from 1st to 3rd grade                                                                                                                             | reading level                                                 | written comprehension                    |
| <b>Dyslexic Adults</b>        | Deficit     | Law et al., 2015            | 36 / 21 native English dyslexic / noncompensated university students (age: 17-26 / 17-28) | 54 / 15 native English university students / compensated dyslexic university students (age: 19-25 / 20-23)                                                                  | age, gender, education, non-verbal IQ / gender, non-verbal IQ | passage reading (Woodcock-Johnson III)   |
|                               |             | Rello et al., 2013          | 23 native Spanish dyslexic adolescents and adults (age: 13-37)                            | 23 native Spanish adolescents and adults (age: 13-35)                                                                                                                       |                                                               | multiple choice text comprehension       |
|                               |             | Beidas et al., 2013         | 34 native Hebrew dyslexic university students (age: 21-28)                                | 35 native Hebrew university students (age: 21-28)                                                                                                                           | chronological age, nonverbal IQ, verbal ability, handedness   | reading comprehension                    |
| <b>Dyslexic Children</b>      | Deficit     | Casalis et al., 2004        | 33 native French dyslexic children (age: 8-12)                                            | 33 / 33 native French non-dyslexic children (mean age: 7.4 / 10.8)                                                                                                          | chronological age / reading age                               | syntactical comprehension (reading)      |
|                               |             | Chung et al., 2010          | 77 dyslexic students (age: 12-14)                                                         | 27 / 27 normally achieving students (age: 12-14 / 9-13)                                                                                                                     | chronological age, IQ / reading level, IQ                     | reading comprehension                    |

For explanation of (3) see end of the table.  
(Continued)

<sup>35</sup> Main effect of groups.

<sup>36</sup> Significant difference with CP, CM2.



Supplementary Table S1 | Continued: Oral comprehension

| Group                         | Performance | Study                                     | Sample characteristics                                                              |                                                                                                                                                                             |                                                                                        | Task                                         |
|-------------------------------|-------------|-------------------------------------------|-------------------------------------------------------------------------------------|-----------------------------------------------------------------------------------------------------------------------------------------------------------------------------|----------------------------------------------------------------------------------------|----------------------------------------------|
|                               |             |                                           | Experimental                                                                        | Control                                                                                                                                                                     | Match                                                                                  |                                              |
| <b>10. Oral comprehension</b> |             |                                           |                                                                                     |                                                                                                                                                                             |                                                                                        |                                              |
| <b>Illiterates</b>            | Deficit     | Rosselli et al., 1990 <sup>37</sup>       | 100 native Spanish illiterates with no formal education and with illiterate parents | 100 native Spanish professionals with professional parents                                                                                                                  | age, gender, handedness                                                                | language comprehension: verbal commands      |
|                               |             | Ostrosky-Solis et al., 1999 <sup>38</sup> | 199 native Spanish illiterate adults (age: 16-85)                                   | 199 / 201 / 201 native Spanish participants with 1-4 / 5-9 / 10-24 years of schooling (age: 16-85)                                                                          |                                                                                        | language comprehension: verbal commands      |
|                               | Normal      | Reis et al., 2003                         | 23 completely illiterate adults (age: 57-76)                                        | 18 / 9 literates with 4 / more than 4 years of schooling (age: 51-76 / 56-69)                                                                                               | age, gender, general health, sociocultural background, level of everyday functionality | oral language comprehension: verbal commands |
| <b>Functional Illiterates</b> | Deficit     | Van Linden and Cremers, 2008 (1)          | 23 functional illiterate adults (age: 21-76)                                        | 23 literate adults (age: 19-64)                                                                                                                                             | age, gender                                                                            | listening                                    |
|                               | Normal      | Eme, 2006 (3) <sup>39</sup>               | 50 native French functional illiterate adults (age: 17-55)                          | 20 / 20 / 20 / 20 native French control children from preparatory class (CP) / "1st grade" (CE1) / "2nd grade" (CE2) / "4th grade" (CM2) (mean age: 6.7 / 7.6 / 8.8 / 10.7) |                                                                                        | oral comprehension                           |
|                               |             | Eme et al., 2014 (3)                      | 52 native French ABE students (age: 17-55)                                          | 52 native French children from 1st to 3rd grade                                                                                                                             | reading level                                                                          | oral comprehension                           |

For explanation of (1), (3) see end of the table.  
(Continued)

<sup>37</sup> The authors divided the participants into groups according to 3 variables. Here we used the most relevant grouping variable: educational level.

<sup>38</sup> The authors ranked the participants into 16 groups according to age and years of education. Here we focus on the years of education.

<sup>39</sup> Main effect of groups.

Supplementary Table S1 | Continued: Oral comprehension

| Group                     | Performance | Study                                     | Sample characteristics                                                                                                             |                                                                                                    |                                        | Task                                                                                   |
|---------------------------|-------------|-------------------------------------------|------------------------------------------------------------------------------------------------------------------------------------|----------------------------------------------------------------------------------------------------|----------------------------------------|----------------------------------------------------------------------------------------|
|                           |             |                                           | Experimental                                                                                                                       | Control                                                                                            | Match                                  |                                                                                        |
| <b>Dyslexic Adults</b>    | No data     |                                           |                                                                                                                                    |                                                                                                    |                                        |                                                                                        |
| <b>Dyslexic Children</b>  | Deficit     | Willcutt et al, 2013                      | 241 /183 / 188 children with reading disability (a) / math disability (b) / reading & math disability (c) (age: 8-13 / 9-13/ 8-13) | 411 control children (d) (age: 8-13)                                                               | age, gender, ethnicity                 | Verbal comprehension (Wechsler Intelligence Scale for Children, Revised) <sup>40</sup> |
|                           | Normal      | Everatt et al., 2008                      | 20 native English dyslexic children (age: 11-12)                                                                                   | 40 native English control children (age: 11-12)                                                    | age, gender                            | listening comprehension                                                                |
|                           |             | Casalis et al., 2004                      | 33 native French dyslexic children (age: 8-12)                                                                                     | 33 / 33 native French non-dyslexic children (mean age: 7.4 / 10.8)                                 | chronological age / reading age        | syntactical comprehension (listening)                                                  |
| <b>11. Naming ability</b> |             |                                           |                                                                                                                                    |                                                                                                    |                                        |                                                                                        |
| <b>Illiterates</b>        | Deficit     | Rosselli et al., 1990 <sup>41</sup>       | 100 native Spanish illiterates with no formal education and with illiterate parents                                                | 100 native Spanish professionals with professional parents                                         | age, gender, handedness                | object, figure, body-part naming                                                       |
|                           |             | Ostrosky-Solis et al., 1999 <sup>42</sup> | 199 native Spanish illiterate adults (age: 16-85)                                                                                  | 199 / 201 / 201 native Spanish participants with 1-4 / 5-9 / 10-24 years of schooling (age: 16-85) |                                        | name line drawing figures                                                              |
|                           |             | Reis et al., 2006                         | 19 illiterate adults (age: 61-75)                                                                                                  | 19 literate adults (age: 56-83)                                                                    | age, gender, socio-cultural background | immediate object naming: colored and black and white photos and drawings               |

(Continued)

<sup>40</sup> Significant difference between a, c and d, and b, c and d.

<sup>41</sup> The authors divided the participants into groups according to 3 variables. Here we used the most relevant grouping variable: educational level.

<sup>42</sup> The authors ranked the participants into 16 groups according to age and years of education. Here we focus on the years of education.

Supplementary Table S1 | Continued: Naming ability

| Group                         | Performance | Study                    | Sample characteristics                                                   |                                                                               |                                                                                        | Task                                                      |
|-------------------------------|-------------|--------------------------|--------------------------------------------------------------------------|-------------------------------------------------------------------------------|----------------------------------------------------------------------------------------|-----------------------------------------------------------|
|                               |             |                          | Experimental                                                             | Control                                                                       | Match                                                                                  |                                                           |
| <b>Illiterates</b>            | Normal      | Reis et al., 2003        | 23 completely illiterate adults (age: 57-76)                             | 18 / 9 literates with 4 / more than 4 years of schooling (age: 51-76 / 56-69) | age, gender, general health, sociocultural background, level of everyday functionality | visual naming: real objects                               |
| <b>Functional Illiterates</b> | Deficit     | Grosche, 2012 (3)        | 54 ABE students (age: 33-53)                                             | 66 native German control adults (age: 32-53)                                  | chronological age                                                                      | color, object and letter naming                           |
|                               | Normal      | Grosche, 2012 (3)        | 54 ABE students (age: 33-53)                                             | 54 children from 1st to 4th grade (age: 7-9)                                  | reading level                                                                          | color, object and letter naming                           |
| <b>Dyslexic Adults</b>        | Deficit     | Hatcher et al., 2002     | 23 dyslexic university students (age: 19-52)                             | 50 university students (age: 18-41)                                           | verbal and non-verbal abilities                                                        | digit and object naming (Phonological Assessment Battery) |
|                               |             | Ramus et al., 2003       | 16 dyslexic university students (age: 19-22)                             | 16 university students (age: 19-24)                                           | age, gender, handedness, full-scale IQ                                                 | automatic picture naming                                  |
|                               |             | De Smedt and Boets, 2011 | 25 dyslexic university students (age: 18-28)                             | 25 normal reading controls (age: 18-29)                                       | age, nonverbal IQ                                                                      | color, object and letter naming                           |
|                               |             | Beidas et al., 2013      | 34 native Hebrew dyslexic university students (age: 21-28)               | 35 native Hebrew university students (age: 21-28)                             | chronological age, nonverbal IQ, verbal ability, handedness                            | naming speed test: objects                                |
|                               |             | Bogdanowicz et al., 2014 | 93 native Polish developmental dyslexic university students (age: 19-24) | 87 native Polish university students (age: 20-24)                             |                                                                                        | Rapid Automatized Naming test: objects                    |
|                               |             | Law et al., 2015         | 36 native English dyslexic university students (age: 17-26)              | 54 native English university students (age: 19-25)                            | age, gender, education, non-verbal IQ                                                  | color and object naming (Phonological Assessment Battery) |

For explanation of (3) see end of the table.  
(Continued)

Supplementary Table S1 | Continued: Naming ability

| Group                    | Performance | Study                    | Sample characteristics                                                                                                      |                                                   |                                                           | Task                                                                                  |
|--------------------------|-------------|--------------------------|-----------------------------------------------------------------------------------------------------------------------------|---------------------------------------------------|-----------------------------------------------------------|---------------------------------------------------------------------------------------|
|                          |             |                          | Experimental                                                                                                                | Control                                           | Match                                                     |                                                                                       |
| <b>Dyslexic Adults</b>   | Deficit     | Wilson et al., 2015      | 18 / 22 / 26 native English dyslexic (a) / dyscalculic (b) / dyslexic & dyscalculic adults (c) (age: 30-32 / 27-31 / 28-32) | 19 native English control adults (d) (age: 26-30) | age, gender, handedness, education, socio-economic status | Digit and letter naming (Comprehensive Test of Phonological Processing) <sup>43</sup> |
|                          | Normal      | Bogdanowicz et al., 2014 | 93 native Polish developmental dyslexic university students (age: 19-24)                                                    | 87 native Polish university students (age: 20-24) |                                                           | Rapid Automatized Naming test: symbols                                                |
| <b>Dyslexic Children</b> | Deficit     | White et al., 2006       | 23 dyslexic children (age: 8-12)                                                                                            | 22 control children (age: 8-12)                   | age, gender, non-verbal IQ                                | naming speed: pictures, digits (Phonological Assessment Battery)                      |
|                          |             | Everatt et al., 2008     | 20 native English dyslexic children (age: 11-12)                                                                            | 40 native English control children (age: 11-12)   | age, gender                                               | color naming, Stroop incongruous color words, incongruous colored objects             |
|                          |             | Willburger et al., 2008  | 18 / 19 / 20 native German dyslexic (a) / dyscalculic (b) / dyslexic & dyscalculic (c) children (age: 8-10)                 | 42 native German control children (d) (age: 8-9)  | age, arithmetic score / age, reading score / age          | digit <sup>44</sup> , letter <sup>45</sup> and object naming <sup>46</sup>            |
|                          |             | Boets and De Smedt, 2010 | 13 native Dutch dyslexic children (age: 8)                                                                                  | 16 native Dutch control children (age: 8)         | gender, parental educational level, intellectual ability  | digit naming                                                                          |
|                          |             | Chung et al., 2010       | 77 dyslexic students (age: 12-14)                                                                                           | 27 normally achieving students (age: 12-14)       | chronological age, IQ                                     | digit and letter naming                                                               |

(Continued)

<sup>43</sup> Significant difference between a, b, c and d.

<sup>44</sup> Significant difference between a and b, d; c and a, b, d.

<sup>45</sup> Significant difference between a and d; c and b, d.

<sup>46</sup> Significant difference between c and d.

Supplementary Table S1 | Continued: Naming ability

| Group                         | Performance | Study                | Sample characteristics                                                                                                              |                                                                                                                          |                                        | Task                                                                           |
|-------------------------------|-------------|----------------------|-------------------------------------------------------------------------------------------------------------------------------------|--------------------------------------------------------------------------------------------------------------------------|----------------------------------------|--------------------------------------------------------------------------------|
|                               |             |                      | Experimental                                                                                                                        | Control                                                                                                                  | Match                                  |                                                                                |
| <b>Dyslexic Children</b>      | Deficit     | Willcutt et al, 2013 | 241 / 183 / 188 children with reading disability (a) / math disability (b) / reading & math disability (c) (age: 8-13 / 9-13/ 8-13) | 411 control children (d) (age: 8-13)                                                                                     | age, gender, ethnicity                 | Rapid Automatized Naming test: objects, numbers, letters, colors <sup>47</sup> |
|                               | Normal      | Landerl et al., 2009 | 21 native German dyslexic children (a) (age: 7-10)                                                                                  | 20 / 26 / 42 native German dyscalculic (b) / dyslexic & dyscalculic (c) / control children (d) (age: 7-10 / 7-11 / 7-10) | age                                    | digit naming                                                                   |
|                               |             | Chung et al., 2010   | 77 dyslexic students (age: 12-14)                                                                                                   | 27 normally achieving students (age: 9-13)                                                                               | reading level, IQ                      | digit and letter naming                                                        |
| <b>12. Reading speed</b>      |             |                      |                                                                                                                                     |                                                                                                                          |                                        |                                                                                |
| <b>Illiterates</b>            | No data     |                      |                                                                                                                                     |                                                                                                                          |                                        |                                                                                |
| <b>Functional Illiterates</b> | No data     |                      |                                                                                                                                     |                                                                                                                          |                                        |                                                                                |
| <b>Dyslexic Adults</b>        | Deficit     | Ramus et al., 2003   | 16 dyslexic university students (age: 19-22)                                                                                        | 16 university students (age: 19-24)                                                                                      | age, gender, handedness, full-scale IQ | National Adult Reading Test                                                    |
|                               |             | Rello et al., 2013   | 23 native Spanish dyslexic adolescents and adults (age: 13-37)                                                                      | 23 native Spanish adolescents and adults (age: 13-35)                                                                    |                                        | reading speed of 4 short texts                                                 |

(Continued)

<sup>47</sup> Significant difference between a, b, c and d.

Supplementary Table S1 | Continued: Reading speed

| Group                    | Performance | Study                      | Sample characteristics                                             |                                                           |                                                                                                                 | Task                                                                                         |
|--------------------------|-------------|----------------------------|--------------------------------------------------------------------|-----------------------------------------------------------|-----------------------------------------------------------------------------------------------------------------|----------------------------------------------------------------------------------------------|
|                          |             |                            | Experimental                                                       | Control                                                   | Match                                                                                                           |                                                                                              |
| <b>Dyslexic Children</b> | Deficit     | Suarez-Coalla et al., 2014 | 20 native Spanish children with developmental dyslexia (age: 7-10) | 40 / 40 native Spanish control children (age: 7-11 / 6-7) | chronological age, gender, IQ, and socio-economic status / reading level, gender, IQ, and socio-economic status | read aloud unfamiliar words alone and within the context of a story, read aloud pseudo-words |

- (1) Sample is termed functional illiterate, but no reason/explanation/diagnostic justification is given
- (2) Experiments on ABE students who are (sometimes) named as functional illiterates
- (3) Experiments on ABE students who are identified as functional illiterates

**Supplementary Table S2 | Summary of cognitive deficits of illiterates, functional illiterates, dyslexic adults and children**

| Group                         | Performance | Study                             | Sample characteristics                                                                           |                                                                                                                    |                                                                                        | Task                                                                                                                                                 |
|-------------------------------|-------------|-----------------------------------|--------------------------------------------------------------------------------------------------|--------------------------------------------------------------------------------------------------------------------|----------------------------------------------------------------------------------------|------------------------------------------------------------------------------------------------------------------------------------------------------|
|                               |             |                                   | Experimental                                                                                     | Control                                                                                                            | Match                                                                                  |                                                                                                                                                      |
| <b>1. Working memory</b>      |             |                                   |                                                                                                  |                                                                                                                    |                                                                                        |                                                                                                                                                      |
| <b>Illiterates</b>            | Deficit     | Ardila et al., 1989 <sup>48</sup> | 100 native Spanish illiterates with no formal education and with illiterate parents (age: 16-65) | 100 native Spanish professionals with professional parents (age: 16-65)                                            | age, gender, handedness                                                                | digit retention: forward and backward                                                                                                                |
|                               |             | Reis et al., 2003                 | 23 completely illiterates (age: 57-76)                                                           | 18 / 9 literates with 4 / more than 4 years of schooling (age: 51-76 / 56-69)                                      | age, gender, general health, sociocultural background, level of everyday functionality | digit span: forward (Wechsler Memory Scale)                                                                                                          |
|                               |             | Kosmidis et al., 2011             | 20 illiterate women (age: 62-76)                                                                 | 12 functional illiterate adults / 6 self-educated women / 27 educated literate adults (age: 61-73 / 60-74 / 58-72) | age, general cognitive status, depression                                              | digit span: forward, backward (Wechsler Adult Intelligence Scale-III), sentence span, spatial span: backward (Wechsler Adult Intelligence Scale-III) |
|                               | Normal      | Silva et al., 2012                | 19 illiterate adults (age: 65-71)                                                                | 19 literate adults (age: 59-73)                                                                                    | age, gender                                                                            | digit span: forward, backward (Wechsler Memory Scale-III)                                                                                            |
|                               |             | Kosmidis et al., 2011             | 20 illiterate women (age: 62-76)                                                                 | 12 functional illiterate adults / 6 self-educated women / 27 educated literate adults (age: 61-73 / 60-74 / 58-72) | age, general cognitive status, depression                                              | spatial span: forward (Wechsler Adult Intelligence Scale-III)                                                                                        |
| <b>Functional Illiterates</b> | Deficit     | Thompkins and Binder, 2003 (2)    | the 15 less and the 15 most skilled readers from 60 adults from ABE classes (age: 17-55)         | 30 control children chosen from a 99 pool (age: 5-8)                                                               | reading level                                                                          | digit span: backward                                                                                                                                 |

For explanation of (2) see end of the table.  
(Continued)

<sup>48</sup> The authors divided the participants into groups according to 3 variables. Here we used the most relevant grouping variable: educational level.

Supplementary Table S2 | Continued: Working memory

| Group                         | Performance | Study                          | Sample characteristics                                                                   |                                                                                                                                                                             |                                   | Task                                                                                                                                                             |
|-------------------------------|-------------|--------------------------------|------------------------------------------------------------------------------------------|-----------------------------------------------------------------------------------------------------------------------------------------------------------------------------|-----------------------------------|------------------------------------------------------------------------------------------------------------------------------------------------------------------|
|                               |             |                                | Experimental                                                                             | Control                                                                                                                                                                     | Match                             |                                                                                                                                                                  |
| <b>Functional Illiterates</b> | Deficit     | Eme, 2006 (3) <sup>49</sup>    | 50 native French functional illiterate adults (age: 17-55)                               | 20 / 20 / 20 / 20 native French control children from preparatory class (CP) / "1st grade" (CE1) / "2nd grade" (CE2) / "4th grade" (CM2) (mean age: 6.7 / 7.6 / 8.8 / 10.7) |                                   | digit span: forwards <sup>50</sup> , backward <sup>51</sup> (Wechsler Adult Intelligence Scale-III)                                                              |
|                               |             | Grosche, 2012 (3)              | 54 ABE students (age: 33-53)                                                             | 66 native German control adults / 54 children from 1st to 4th grade (age: 32-53 / 7-9)                                                                                      | chronological age / reading level | word span (1 syllable words), word span (3 syllable words) <sup>52</sup> , pseudo-word repetition (Arbeitsgedächtnistestbatterie für Kinder von 5 bis 12 Jahren) |
|                               | Normal      | Grosche, 2012 (3)              | 54 ABE students (age: 33-53)                                                             | 54 children from 1st to 4th grade (age: 7-9)                                                                                                                                | reading level                     | word span (3 syllable words) (Arbeitsgedächtnistestbatterie für Kinder von 5 bis 12 Jahren)                                                                      |
|                               |             | Thompkins and Binder, 2003 (2) | the 15 less and the 15 most skilled readers from 60 adults from ABE classes (age: 17-55) | 30 control children chosen from a 99 pool (age: 5-8)                                                                                                                        | reading level                     | digit span: forward                                                                                                                                              |
| <b>Dyslexic Adults</b>        | Deficit     | Hatcher et al., 2002           | 23 dyslexic university students (age: 19-52)                                             | 50 university students (age: 18-41)                                                                                                                                         | verbal and non-verbal abilities   | digit span: forward, backward (Wechsler Adult Intelligence Scale-Revised)                                                                                        |

For explanation of (2), (3) see end of the table.  
(Continued)

<sup>49</sup> Main effect groups.

<sup>50</sup> Significant difference with CE1, CM2.

<sup>51</sup> Significant difference with CM2.

<sup>52</sup> Significant difference between the adult groups.



Supplementary Table S2 | Continued: Working memory

| Group                  | Performance | Study                          | Sample characteristics                                                   |                                                    |                                                                                      | Task                                                                                                                            |
|------------------------|-------------|--------------------------------|--------------------------------------------------------------------------|----------------------------------------------------|--------------------------------------------------------------------------------------|---------------------------------------------------------------------------------------------------------------------------------|
|                        |             |                                | Experimental                                                             | Control                                            | Match                                                                                |                                                                                                                                 |
| <b>Dyslexic Adults</b> | Deficit     | Brosnan et al., 2002           | 9 dyslexic university students (age: 22-45)                              | 9 university students (age: 22-37)                 | gender, age, academic year and major, current academic grades, socio-economic status | digit span: forward, backward (Wechsler Adult Intelligence Scale-Revised)                                                       |
|                        |             | Brosnan et al., 2002           | 15 dyslexic university students (age: 19-26)                             | 15 university students (age: 23-28)                | gender, age, academic year and major, current academic grades, socio-economic status | digit span: forward, backward (Wechsler Adult Intelligence Scale-Revised)                                                       |
|                        |             | Wiseheart et al., 2009         | 23 native English adults with developmental dyslexia (age: 17-23)        | 33 native English university students (age: 18-23) | age                                                                                  | digit span: forward, backward (Wechsler Memory Scale), digit ordering                                                           |
|                        |             | Abd Ghani and Gathercole, 2013 | 26 dyslexic university students                                          | 32 university students                             |                                                                                      | listening recall, backward digit span, odd one out, spatial recall (Automated Working Memory Assessment)                        |
|                        |             | Beidas et al., 2013            | 34 native Hebrew dyslexic university students (age: 21-28)               | 35 native Hebrew university students (age: 21-28)  | chronological age, nonverbal IQ, verbal ability, handedness                          | Neuropsychological Examination CogniFit Personal Coach: auditory verbal, visual                                                 |
|                        |             | Bogdanowicz et al., 2014       | 93 native Polish developmental dyslexic university students (age: 19-24) | 87 native Polish university students (age: 20-24)  |                                                                                      | digit span (Wechsler Memory Scale III)                                                                                          |
|                        |             | Law et al., 2015               | 36 native English dyslexic university students (age: 17-26)              | 54 native English university students (age: 19-25) | age, gender, education, non-verbal IQ                                                | digit span: forward (Clinical Evaluation of Language Fundamentals Fourth Edition), nonword recall (Working Memory Test Battery) |

(Continued)

Supplementary Table S2 | Continued: Working memory

| Group                    | Performance | Study                    | Sample characteristics                                     |                                                                                                                          |                                                                                      | Task                                                                                                                                        |
|--------------------------|-------------|--------------------------|------------------------------------------------------------|--------------------------------------------------------------------------------------------------------------------------|--------------------------------------------------------------------------------------|---------------------------------------------------------------------------------------------------------------------------------------------|
|                          |             |                          | Experimental                                               | Control                                                                                                                  | Match                                                                                |                                                                                                                                             |
| <b>Dyslexic Adults</b>   | Deficit     | Smith-Spark et al., 2016 | 31 dyslexic university students (age: 19-30)               | 30 control university students (age: 18-29)                                                                              | age, IQ                                                                              | operation span, symmetry span                                                                                                               |
|                          | Normal      | Brosnan et al., 2002     | 15 dyslexic university students (age: 19-26)               | 15 university students (age: 23-28)                                                                                      | gender, age, academic year and major, current academic grades, socio-economic status | spatial span (Cambridge Neuropsychological Test Automated Battery)                                                                          |
|                          |             | Beidas et al., 2013      | 34 native Hebrew dyslexic university students (age: 21-28) | 35 native Hebrew university students (age: 21-28)                                                                        | chronological age, nonverbal IQ, verbal ability, handedness                          | Neuropsychological Examination CogniFit Personal Coach: auditory non-verbal                                                                 |
| <b>Dyslexic Children</b> | Deficit     | Brosnan et al., 2002     | 16 dyslexic children (age: 9-10)                           | 16 non-dyslexic children (age: 9-10)                                                                                     | age, gender                                                                          | digit span: silent, noisy (Wechsler Adult Intelligence Scale-III)                                                                           |
|                          |             | Everatt et al., 2008     | 20 native English dyslexic children (age: 11-12)           | 40 native English control children (age: 11-12)                                                                          | age, gender                                                                          | digit span: forward, reverse (Wechsler Intelligence Scale for Children)                                                                     |
|                          |             | Landerl et al., 2009     | 21 native German dyslexic children (a) (age: 7-10)         | 20 / 26 / 42 native German dyscalculic (b) / dyslexic & dyscalculic (c) / control children (d) (age: 7-10 / 7-11 / 7-10) | age                                                                                  | digit span: backward (Wechsler Intelligence Scale for Children-III) <sup>53</sup> , nonword span <sup>54</sup> , Corsi blocks <sup>55</sup> |
|                          |             | Beneventi et al., 2010   | 12 native Norwegian dyslexic children (age: 13-14)         | 14 native Norwegian control children (age: 12-13)                                                                        | age, gender, non-verbal IQ                                                           | n-back task with letters: 0-back, 1-back, 2-back <sup>56</sup>                                                                              |

(Continued)

<sup>53</sup> Significant difference between a and c.

<sup>54</sup> Significant difference between a and d.

<sup>55</sup> Significant difference between a and c.

<sup>56</sup> Significant main effect of group on accuracy (1-back, 2-back) and on reaction time (0-back, 1-back, 2-back).

Supplementary Table S2 | Continued: Working memory

| Group                    | Performance | Study                                     | Sample characteristics                                                                                                               |                                                                                                                          |                                           | Task                                                                                                                  |
|--------------------------|-------------|-------------------------------------------|--------------------------------------------------------------------------------------------------------------------------------------|--------------------------------------------------------------------------------------------------------------------------|-------------------------------------------|-----------------------------------------------------------------------------------------------------------------------|
|                          |             |                                           | Experimental                                                                                                                         | Control                                                                                                                  | Match                                     |                                                                                                                       |
| <b>Dyslexic Children</b> | Deficit     | Chung et al., 2010                        | 77 dyslexic students (age: 12-14)                                                                                                    | 27 / 27 normally achieving students (age: 12-14 / 9-13)                                                                  | chronological age, IQ / reading level, IQ | digit span: backward                                                                                                  |
|                          |             | Willcutt et al., 2013                     | 241 / 183 / 188 children with reading disability (a) / math disability (b) / reading & math disability (c) (age: 8-13 / 9-13 / 8-13) | 411 control children (d) (age: 8-13)                                                                                     | age, gender, ethnicity                    | sentence span, counting span, digit span: backwards (Wechsler Intelligence Scale for Children, Revised) <sup>57</sup> |
|                          |             | Varvara et al., 2014                      | 60 children and adolescents with developmental dyslexia (age: 8-17)                                                                  | 65 children with typical reading abilities (age: 8-16)                                                                   | chronological and mental age              | verbal span, non-word repetition, visual span                                                                         |
|                          | Normal      | Landerl et al., 2009                      | 21 native German dyslexic children (a) (age: 7-10)                                                                                   | 20 / 26 / 42 native German dyscalculic (b) / dyslexic & dyscalculic (c) / control children (d) (age: 7-10 / 7-11 / 7-10) | age                                       | digit span: forward (Wechsler Intelligence Scale for Children-III)                                                    |
|                          |             | Varvara et al., 2014                      | 60 children and adolescents with developmental dyslexia (age: 8-17)                                                                  | 65 children with typical reading abilities (age: 8-16)                                                                   | chronological and mental age              | visual-spatial span                                                                                                   |
| <b>2. Attention</b>      |             |                                           |                                                                                                                                      |                                                                                                                          |                                           |                                                                                                                       |
| <b>Illiterates</b>       | Deficit     | Ostrosky-Solis et al., 1999 <sup>58</sup> | 199 native Spanish illiterate adults (age: 16-85)                                                                                    | 199 / 201 / 201 native Spanish participants with 1-4 / 5-9 / 10-24 years of schooling (age: 16-85)                       |                                           | digits backwards, visual detection, serial 3 subtraction                                                              |
|                          |             | Landgraf et al., 2011                     | 47 illiterate non-native participants                                                                                                | 41 literate native German (except 3) participants                                                                        | age, gender, handedness                   | d2                                                                                                                    |

(Continued)

<sup>57</sup> Significant difference between a and c, d; b and c, d.

<sup>58</sup> The authors ranked the participants into 16 groups according to age and years of education. Here we focus on the years of education.

Supplementary Table S2 | Continued: Attention

| Group                         | Performance | Study                            | Sample characteristics                                                                                                                 |                                                                                                                                                                             |                                                             | Task                                                                                                                  |
|-------------------------------|-------------|----------------------------------|----------------------------------------------------------------------------------------------------------------------------------------|-----------------------------------------------------------------------------------------------------------------------------------------------------------------------------|-------------------------------------------------------------|-----------------------------------------------------------------------------------------------------------------------|
|                               |             |                                  | Experimental                                                                                                                           | Control                                                                                                                                                                     | Match                                                       |                                                                                                                       |
| <b>Functional Illiterates</b> | Deficit     | Van Linden and Cremers, 2008 (1) | 23 functional illiterate adults (age: 21-76)                                                                                           | 23 literate adults (age: 19-64)                                                                                                                                             | age, gender                                                 | steer a moving figure                                                                                                 |
|                               | Normal      | Eme, 2006 (3) <sup>59</sup>      | 50 native French functional illiterate adults (age: 17-55)                                                                             | 20 / 20 / 20 / 20 native French control children from preparatory class (CP) / "1st grade" (CE1) / "2nd grade" (CE2) / "4th grade" (CM2) (mean age: 6.7 / 7.6 / 8.8 / 10.7) |                                                             | selective attention <sup>60</sup>                                                                                     |
| <b>Dyslexic Adults</b>        | Deficit     | Beidas et al., 2013              | 34 native Hebrew dyslexic university students (age: 21-28)                                                                             | 35 native Hebrew university students (age: 21-28)                                                                                                                           | chronological age, nonverbal IQ, verbal ability, handedness | sustained attention, divided attention, avoiding distracters (Neuropsychological Examination CogniFit Personal Coach) |
|                               |             | Bogdanowicz et al., 2014         | 93 native Polish developmental dyslexic university students (age: 19-24)                                                               | 87 native Polish university students (age: 20-24)                                                                                                                           |                                                             | difficult figure-copying                                                                                              |
| <b>Dyslexic Children</b>      | Deficit     | Zoubrinetzky et al., 2014        | 14 / 14 native French dyslexic children with visual attention span difficulties (a) / phonological difficulties (b) (age: 8-12 / 8-11) | 14 / 14 native French control children (c) / (d) (age: 8-11 / 6-7)                                                                                                          | (c) chronological age / (d) reading age                     | visual attention span: global and partial letter report <sup>61</sup>                                                 |
|                               |             | Varvara et al., 2014             | 60 children and adolescents with developmental dyslexia (age: 8-17)                                                                    | 65 children with typical reading abilities (age: 8-16)                                                                                                                      | chronological and mental age                                | map mission (Test of Everyday Attention for Children), code transmission (Test of Everyday Attention for Children)    |

For explanation of (1), (3) see end of the table.  
(Continued)

<sup>59</sup> Main effect of groups.

<sup>60</sup> Significant difference with CP, CE1, CE2.

<sup>61</sup> Significant difference between a and b, c, d; b and a, d; c and a, d; d and a, b, c.

Supplementary Table S2 | Continued: Attention

| Group                         | Performance | Study                                     | Sample characteristics                                                                                      |                                                                                                                                    |                                                  | Task                                                                                                                                                                                       |
|-------------------------------|-------------|-------------------------------------------|-------------------------------------------------------------------------------------------------------------|------------------------------------------------------------------------------------------------------------------------------------|--------------------------------------------------|--------------------------------------------------------------------------------------------------------------------------------------------------------------------------------------------|
|                               |             |                                           | Experimental                                                                                                | Control                                                                                                                            | Match                                            |                                                                                                                                                                                            |
| <b>Dyslexic Children</b>      | Normal      | Willburger et al., 2008                   | 18 / 19 / 20 native German dyslexic (a) / dyscalculic (b) / dyslexic & dyscalculic (c) children (age: 8-10) | 42 native German control children (d) (age: 8-9)                                                                                   | age, arithmetic score / age, reading score / age | alertness, flexibility, sustained attention (Test of Attention Performance for Children)                                                                                                   |
| <b>3. Perception</b>          |             |                                           |                                                                                                             |                                                                                                                                    |                                                  |                                                                                                                                                                                            |
| <b>Illiterates</b>            | Deficit     | Ardila et al., 1989 <sup>62</sup>         | 100 native Spanish illiterates with no formal education and with illiterate parents (age: 16-65)            | 100 native Spanish professionals with professional parents (age: 16-65)                                                            | age, gender, handedness                          | immediate reproduction of the Rey-Osterieth complex figure and of a cube and a house                                                                                                       |
|                               |             | Ostrosky-Solis et al., 1999 <sup>63</sup> | 199 native Spanish illiterate adults (age: 16-85)                                                           | 199 / 201 / 201 native Spanish participants with 1-4 / 5-9 / 10-24 years of schooling (age: 16-85)                                 |                                                  | copy of a semicomplex figure                                                                                                                                                               |
|                               |             | Dansilio and Charamelo, 2005              | 15 illiterate adults (age: 31-79)                                                                           | 15 literate adults                                                                                                                 | age, gender, handedness                          | figure copying: triangle, diamond, cube, house                                                                                                                                             |
| <b>Functional Illiterates</b> | Deficit     | Van Linden and Cremers, 2008 (1)          | 23 functional illiterate adults (age: 21-76)                                                                | 23 literate adults (age: 19-64)                                                                                                    | age, gender                                      | copy the Rey complex figure                                                                                                                                                                |
|                               |             | Rüsseler et al., 2011 (3)                 | 30 / 30 native German functional illiterate adults (age: 19-58 / 22-67)                                     | 30 / 30 native German normal readers / 30 native German children with reading and writing disabilities (age: 18-55 / 19-69 / 7-14) | age, IQ / age / -                                | visual and auditory order threshold, spatial hearing, auditory frequency and time pattern recognition, pitch discrimination, auditory motor coordination, choice reaction time (Brain-Boy) |

For explanation of (1), (3) see end of the table.

(Continued)

<sup>62</sup> The authors divided the participants into groups according to 3 variables. Here we used the most relevant grouping variable: educational level.

<sup>63</sup> The authors ranked the participants into 16 groups according to age and years of education. Here we focus on the years of education.

Supplementary Table S2 | Continued: Perception

| Group                    | Performance         | Study                                                      | Sample characteristics                                                   |                                                             |                                                                            | Task                                                                                                                                                                                                                                                                    |
|--------------------------|---------------------|------------------------------------------------------------|--------------------------------------------------------------------------|-------------------------------------------------------------|----------------------------------------------------------------------------|-------------------------------------------------------------------------------------------------------------------------------------------------------------------------------------------------------------------------------------------------------------------------|
|                          |                     |                                                            | Experimental                                                             | Control                                                     | Match                                                                      |                                                                                                                                                                                                                                                                         |
| <b>Dyslexic Adults</b>   | Deficit             | Ramus et al., 2003                                         | 16 dyslexic university students (age: 19-22)                             | 16 university students (age: 19-24)                         | age, gender, handedness, full-scale IQ                                     | temporal order                                                                                                                                                                                                                                                          |
|                          |                     | Leong et al., 2011                                         | 20 native English dyslexic adults (age: 17-41)                           | 20 native English control adults (age: 18-38)               | chronological age                                                          | amplitude envelope onset (rise time), frequency, intensity, syllable stress, word stress                                                                                                                                                                                |
|                          |                     | Bogdanowicz et al., 2014                                   | 93 native Polish developmental dyslexic university students (age: 19-24) | 87 native Polish university students (age: 20-24)           |                                                                            | difficult figure-copying                                                                                                                                                                                                                                                |
|                          | Beidas et al., 2013 | 34 native Hebrew dyslexic university students (age: 21-28) | 35 native Hebrew university students (age: 21-28)                        | chronological age, nonverbal IQ, verbal ability, handedness | visual perception (Neuropsychological Examination CogniFit Personal Coach) |                                                                                                                                                                                                                                                                         |
|                          | Normal              | Ramus et al., 2003                                         | 16 dyslexic university students (age: 19-22)                             | 16 university students (age: 19-24)                         | age, gender, handedness, full-scale IQ                                     | auditory: backward and simultaneous masking, formant discrimination in syllables and non-speech analogues, phonemic categorization, frequency modulation detection;<br><br>visual: visual acuity, contrast sensitivity, speed discrimination, coherent motion detection |
| <b>Dyslexic Children</b> | Deficit             | Ziegler et al., 2010                                       | 28 dyslexic children (age: 8-12)                                         | 29 normally developing children (age: 8-11)                 | chronological age, nonverbal IQ                                            | perception of letter and digit strings                                                                                                                                                                                                                                  |

(Continued)

Supplementary Table S2 | Continued: Perception

| Group                         | Performance | Study                 | Sample characteristics                                                                                                             |                                                   |                                                                                      | Task                                                                                                                                                                       |
|-------------------------------|-------------|-----------------------|------------------------------------------------------------------------------------------------------------------------------------|---------------------------------------------------|--------------------------------------------------------------------------------------|----------------------------------------------------------------------------------------------------------------------------------------------------------------------------|
|                               |             |                       | Experimental                                                                                                                       | Control                                           | Match                                                                                |                                                                                                                                                                            |
| <b>Dyslexic Children</b>      | Deficit     | Willcutt et al, 2013  | 241 /183 / 188 children with reading disability (a) / math disability (b) / reading & math disability (c) (age: 8-13 / 9-13/ 8-13) | 411 control children (d) (age: 8-13)              | age, gender, ethnicity                                                               | symbol search, coding (Wechsler Intelligence Scale for Children-III), Colorado Perceptual Speed Test, Educational Testing Service Identical Pictures Subtest <sup>64</sup> |
|                               | Normal      | Joanisse et al., 2000 | 61 dyslexic children (age: 7-9)                                                                                                    | 52 / 37 non-dyslexic children (age: 7-9 / 6-8)    | chronological age / reading level                                                    | single stimulus categorization                                                                                                                                             |
|                               |             | Ziegler et al., 2010  | 28 dyslexic children (age: 8-12)                                                                                                   | 29 normally developing children (age: 8-11)       | chronological age, nonverbal IQ                                                      | perception of symbol strings                                                                                                                                               |
| <b>4. Executive functions</b> |             |                       |                                                                                                                                    |                                                   |                                                                                      |                                                                                                                                                                            |
| <b>Illiterates</b>            | No data     |                       |                                                                                                                                    |                                                   |                                                                                      |                                                                                                                                                                            |
| <b>Functional Illiterates</b> | No data     |                       |                                                                                                                                    |                                                   |                                                                                      |                                                                                                                                                                            |
| <b>Dyslexic Adults</b>        | Deficit     | Brosnan et al., 2002  | 9 dyslexic university students (age: 22-45)                                                                                        | 9 university students (age: 22-37)                | gender, age, academic year and major, current academic grades, socio-economic status | group-embedded figures                                                                                                                                                     |
|                               |             | Beidas et al., 2013   | 34 native Hebrew dyslexic university students (age: 21-28)                                                                         | 35 native Hebrew university students (age: 21-28) | chronological age, nonverbal IQ, verbal ability, handedness                          | planning measure, shifting attention measure, inhibition measure (Neuropsychological Examination CogniFit Personal Coach)                                                  |

(Continued)

<sup>64</sup> Significant difference between a and c, d; b and c, d.

Supplementary Table S2 | Continued: Executive functions

| Group                    | Performance           | Study                                                                                                                              | Sample characteristics                       |                                             |                                                                                                                                                                                           | Task                                                                                                                                      |
|--------------------------|-----------------------|------------------------------------------------------------------------------------------------------------------------------------|----------------------------------------------|---------------------------------------------|-------------------------------------------------------------------------------------------------------------------------------------------------------------------------------------------|-------------------------------------------------------------------------------------------------------------------------------------------|
|                          |                       |                                                                                                                                    | Experimental                                 | Control                                     | Match                                                                                                                                                                                     |                                                                                                                                           |
| <b>Dyslexic Adults</b>   | Deficit               | Smith-Spark et al., 2016                                                                                                           | 31 dyslexic university students (age: 19-30) | 30 control university students (age: 18-29) | age, IQ                                                                                                                                                                                   | plus-minus, inhibition <sup>65</sup>                                                                                                      |
|                          | Normal                | Brosnan et al., 2002                                                                                                               | 9 dyslexic university students (age: 22-45)  | 9 university students (age: 22-37)          | gender, age, academic year and major, current academic grades, socio-economic status                                                                                                      | stockings of Cambridge (Cambridge Neuropsychological Test Automated Battery), picture arrangement (Wechsler Adult Intelligence Scale-III) |
| <b>Dyslexic Children</b> | Deficit               | Smith-Spark et al., 2016                                                                                                           | 31 dyslexic university students (age: 19-30) | 30 control university students (age: 18-29) | age, IQ                                                                                                                                                                                   | inhibition <sup>66</sup>                                                                                                                  |
|                          |                       | Brosnan et al., 2002                                                                                                               | 30 dyslexic children (age: 13-14)            | 30 non-dyslexic children (age: 13-14)       | age, gender, demographic variables, socio-economic status, academic performance                                                                                                           | group-embedded figures                                                                                                                    |
|                          | Willcutt et al., 2013 | 241 /183 / 188 children with reading disability (a) / math disability (b) / reading & math disability (c) (age: 8-13 / 9-13/ 8-13) | 411 control children (d) (age: 8-13)         | age, gender, ethnicity                      | inhibition: stop-signal task, Gordon Diagnostic System <sup>67</sup> , set shifting: Wisconsin Card Sorting Test <sup>68</sup> , inference control: Stroop (color and word) <sup>69</sup> |                                                                                                                                           |

(Continued)

<sup>65</sup> Significant difference for the accuracy of non-habituated stimuli.

<sup>66</sup> Non-significant difference for accuracy and reaction time of habituated stimuli, and for reaction time of non-habituated stimuli.

<sup>67</sup> Significant difference between d and a, b, c.

<sup>68</sup> Significant difference between a and b, c; b and a, c; c and a, d; d and b, c.

<sup>69</sup> Significant difference between a and b, d; b and a, c, d; c and b, d; d and a, b, c.



Supplementary Table S2 | Continued: Executive functions

| Group                         | Performance | Study                                     | Sample characteristics                                                              |                                                                                                    |                                                                                        | Task                                                                                                                                                  |
|-------------------------------|-------------|-------------------------------------------|-------------------------------------------------------------------------------------|----------------------------------------------------------------------------------------------------|----------------------------------------------------------------------------------------|-------------------------------------------------------------------------------------------------------------------------------------------------------|
|                               |             |                                           | Experimental                                                                        | Control                                                                                            | Match                                                                                  |                                                                                                                                                       |
| <b>Dyslexic Children</b>      | Normal      | Varvara et al., 2014                      | 60 children and adolescents with developmental dyslexia (age: 8-17)                 | 65 children with typical reading abilities (age: 8-16)                                             | chronological and mental age                                                           | Wisconsin Card Sorting Test                                                                                                                           |
| <b>5. Motor functions</b>     |             |                                           |                                                                                     |                                                                                                    |                                                                                        |                                                                                                                                                       |
| <b>Illiterates</b>            | Deficit     | Rosselli et al., 1990 <sup>70</sup>       | 100 native Spanish illiterates with no formal education and with illiterate parents | 100 native Spanish professionals with professional parents                                         | age, gender, handedness                                                                | buccofacial praxis, ideomotor praxis, finger alternating movements, meaningless movements, coordinated movements with both hands, motor impersistence |
|                               |             | Ostrosky-Solis et al., 1999 <sup>71</sup> | 199 native Spanish illiterate adults (age: 16-85)                                   | 199 / 201 / 201 native Spanish participants with 1-4 / 5-9 / 10-24 years of schooling (age: 16-85) |                                                                                        | changing the position of the hand, alternating hand movements, opposite reactions                                                                     |
|                               | Normal      | Reis et al., 2003                         | 23 completely illiterate adults (age: 57-76)                                        | 18 / 9 literates with 4 / more than 4 years of schooling (age: 51-76 / 56-69)                      | age, gender, general health, sociocultural background, level of everyday functionality | buccofacial, symbolic and limb ideomotor gestures                                                                                                     |
| <b>Functional Illiterates</b> | No data     |                                           |                                                                                     |                                                                                                    |                                                                                        |                                                                                                                                                       |
| <b>Dyslexic Adults</b>        | Deficit     | Brookes et al, 2010                       | 20 dyslexic adults (age: 18-26)                                                     | 30 university students (age: 20-23)                                                                | IQ, age                                                                                | blindfolded heel-to-toe, "hold your arms"                                                                                                             |

(Continued)

<sup>70</sup> The authors divided the participants into groups according to 3 variables. Here we used the most relevant grouping variable: educational level.

<sup>71</sup> The authors ranked the participants into 16 groups according to age and years of education. Here we focus on the years of education.

Supplementary Table S2 | Continued: Motor functions

| Group                    | Performance | Study                | Sample characteristics                           |                                                 |                                        | Task                                                                                              |
|--------------------------|-------------|----------------------|--------------------------------------------------|-------------------------------------------------|----------------------------------------|---------------------------------------------------------------------------------------------------|
|                          |             |                      | Experimental                                     | Control                                         | Match                                  |                                                                                                   |
| <b>Dyslexic Adults</b>   | Normal      | Ramus et al., 2003   | 16 dyslexic university students (age: 19-22)     | 16 university students (age: 19-24)             | age, gender, handedness, full-scale IQ | balance/dual, bead threading, finger-to-thumb, repetitive finger-tapping, bimanual finger-tapping |
|                          |             | Brookes et al, 2010  | 20 dyslexic adults (age: 18-26)                  | 30 university students (age: 20-23)             | age, IQ                                | eyes-open heel-to-toe, "hold your arms"                                                           |
| <b>Dyslexic Children</b> | Deficit     | White et al., 2006   | 23 dyslexic children (age: 8-12)                 | 22 control children (age: 8-12)                 | age, gender, non-verbal IQ             | stork balance, heel-to-toe                                                                        |
|                          |             | Brookes et al, 2010  | 16 dyslexic children (age: 11-13)                | 25 control children (age: 11-13)                | age, IQ                                | eyes-open and blindfolded heel-to-toe, "hold your arms"                                           |
|                          | Normal      | Everatt et al., 2008 | 20 native English dyslexic children (age: 11-12) | 40 native English control children (age: 11-12) | age, gender                            | bead threading (based on the Dyslexia Screening Test)                                             |
|                          |             | White et al., 2006   | 23 dyslexic children (age: 8-12)                 | 22 control children (age: 8-12)                 | age, gender, non-verbal IQ             | bead threading, finger and thumb                                                                  |

(1) Sample is termed functional illiterate, but no reason/explanation/diagnostic justification is given

(2) Experiments on ABE students who are (sometimes) named as functional illiterates

(3) Experiments on ABE students who are identified as functional illiterates

**Supplementary Table S3 | Summary of mathematical related deficits of illiterates, functional illiterates, dyslexic adults and children**

| Group                         | Performance | Study                                     | Sample characteristics                                                              |                                                                                                    |                                                                                        | Task                                                                                           |
|-------------------------------|-------------|-------------------------------------------|-------------------------------------------------------------------------------------|----------------------------------------------------------------------------------------------------|----------------------------------------------------------------------------------------|------------------------------------------------------------------------------------------------|
|                               |             |                                           | Experimental                                                                        | Control                                                                                            | Match                                                                                  |                                                                                                |
| <b>Arithmetic abilities</b>   |             |                                           |                                                                                     |                                                                                                    |                                                                                        |                                                                                                |
| <b>Illiterates</b>            | Deficit     | Rosselli et al., 1990 <sup>72</sup>       | 100 native Spanish illiterates with no formal education and with illiterate parents | 100 native Spanish professionals with professional parents                                         | age, gender, handedness                                                                | basic mental calculations                                                                      |
|                               |             | Ostrosky-Solis et al., 1999 <sup>73</sup> | 199 native Spanish illiterate adults (age: 16-85)                                   | 199 / 201 / 201 native Spanish participants with 1-4 / 5-9 / 10-24 years of schooling (age: 16-85) |                                                                                        | simple arithmetic problems                                                                     |
|                               |             | Reis et al., 2003                         | 23 completely illiterate adults (age: 57-76) (sample 1)                             | 18 / 9 literates with 4 / more than 4 years of schooling (age: 51-76 / 56-69)                      | age, gender, general health, sociocultural background, level of everyday functionality | mental calculation: addition, subtraction and multiplication                                   |
| <b>Functional Illiterates</b> | No data     |                                           |                                                                                     |                                                                                                    |                                                                                        |                                                                                                |
| <b>Dyslexic Adults</b>        | Deficit     | Hatcher et al., 2002                      | 23 dyslexic university students (age: 19-52)                                        | 50 university students (age: 18-41)                                                                | verbal and non-verbal abilities                                                        | orally presented additions, subtractions (Graded Difficulty Arithmetic Test)                   |
|                               |             | De Smedt and Boets, 2011                  | 25 dyslexic university students (age: 18-28)                                        | 25 normal reading controls (age: 18-29)                                                            | age, nonverbal IQ                                                                      | subtractions, multiplications                                                                  |
|                               | Normal      | Simmons and Singleton, 2006 <sup>74</sup> | 19 dyslexic university students (age: 19-22)                                        | 19 university students (age: 19-21)                                                                | age, IQ                                                                                | maths suite numbers and number facts: addition, subtraction, multiplication (LADS Memory test) |

*(Continued)*

<sup>72</sup> The authors divided the participants into groups according to 3 variables. Here we used the most relevant grouping variable: educational level.

<sup>73</sup> The authors ranked the participants into 16 groups according to age and years of education. Here we focus on the years of education.

<sup>74</sup> Non-significant difference in accuracy but significant difference in speed.

Supplementary Table S3 | Continued: Arithmetic abilities

| Group                    | Performance | Study                    | Sample characteristics                                                                                                      |                                                                                                                          |                                                           | Task                                                                                                                     |
|--------------------------|-------------|--------------------------|-----------------------------------------------------------------------------------------------------------------------------|--------------------------------------------------------------------------------------------------------------------------|-----------------------------------------------------------|--------------------------------------------------------------------------------------------------------------------------|
|                          |             |                          | Experimental                                                                                                                | Control                                                                                                                  | Match                                                     |                                                                                                                          |
| <b>Dyslexic Adults</b>   | Normal      | De Smedt and Boets, 2011 | 25 dyslexic university students (age: 18-28)                                                                                | 25 normal reading controls (age: 18-29)                                                                                  | age, nonverbal IQ                                         | non-symbolic magnitude comparison                                                                                        |
|                          |             | Wilson et al., 2015      | 18 / 22 / 26 native English dyslexic (a) / dyscalculic (b) / dyslexic & dyscalculic adults (c) (age: 30-32 / 27-31 / 28-32) | 19 native English control adults (d) (age: 26-30)                                                                        | age, gender, handedness, education, socio-economic status | enumeration, number comparison, numerosity comparison, number line estimation, multiplication, subtraction <sup>75</sup> |
| <b>Dyslexic Children</b> | Deficit     | Boets and De Smedt, 2010 | 13 native Dutch dyslexic children (age: 8)                                                                                  | 16 native Dutch control children (age: 8)                                                                                | gender, parental educational level, intellectual ability  | single-digit multiplication and subtraction                                                                              |
|                          | Normal      | Landerl et al., 2009     | 21 native German dyslexic children (a) (age: 7-10)                                                                          | 20 / 26 / 42 native German dyscalculic (b) / dyslexic & dyscalculic (c) / control children (d) (age: 7-10 / 7-11 / 7-10) | age                                                       | symbolic magnitude comparison, non-symbolic magnitude comparison, number line estimation                                 |

<sup>75</sup> Significant difference between b and d in all tasks except in numerosity comparison.
